# Supplementary material
Source: publisher figshare collection journal article supplement (https://geolsoc.figshare.com/ndownloader/files/25472357)
Supplement: Supplementary file 1 [file 25472357]

## Sheet: Table 4
Select MBLVG Volcano Lithofacies and Age Data for Determining Syneruptive Records of Paleo-Ice-Levels
Lat	Long	Volcano/ Locality	Diagnostic Lithofacies	Paleoenvironment	Rel. to local ice (m)	Rel. to Regional Paleo-ice (m)	Distance from Coast (km)	Age (Ma)	±	2 s.d.	Ref. code	Reference
-76.2817	-112.109	Takahe Oeschger Bl.	lava	subaerial cone, late-stage flank	200	<+200	150	0.007	±	0.013	C	W (1997)
-76.2817	-112.109	Takahe, upper Moll Spur	scoriaceous lava/pillow	subglacial to subaerial, late-stage flank	575	575	150	0.0175	±	0.0048	H	this study
-76.2817	-112.109	Takahe Gill Bluff	scoriaceous lava/pillow	subglacial to subaerial, late-stage flank	412	412	150	0.0213	±	0.004	H	this study
-76.8078	-117.699	Frakes, English Rk	scoriaceous tuff	subaerial, late stage cone	150	<+150	275	0.0335	±	0.014	H	this study
-76.3844	-112.194	Takahe, lower Moll Spur	scoriaceous lava/pillow	subglacial to subaerial, late-stage flank	300	300	150	0.0345	±	0.0092	H	this study
-76.2817	-112.109	Takahe, Steuri Glacier	scoriaceous tuff	subaerial, late-stage flank	50	<+50	150	0.0456	±	0.007	C	W (1997)
-76.2817	-112.109	Takahe, Stauffer Bl	hyalotuff/pillow lava	subglacial to emergent late-stage flank	350	350	150	0.0647	±	0.0133	H	this study
-76.2817	-112.109	Takahe, Cadenazzi	hyalotuff, scoriaceous tuff	emergent, slope ice (?)	200	200	150	0.085	±	0.006	H	this study
-76.2817	-112.109	Takahe, Roper Pt.	scoriaceous tuff	subaerial, late stage cone	50	<+50	150	0.1053	±	0.028	H	this study
-77.1686	-126.894	Waesche lower	scoriaceous tuff, lava	subaerial, edifice-building	0	same or lower	310	0.2	±	0.4	A	L&T 1990
-76.0378	-135.959	Berlin, Mefford Knoll	scoriaceous tuff	subaerial, late stage cone	200	<+200 (?)	125	0.214	±	0.018	D	W 1999
-76.0378	-135.959	Berlin, Wedemeyer Rk	ignimbrite	subaerial, late stage flank(?)	50	<+50	125	0.231	±	0.012	D	W 1999
-76.0378	-135.959	Berlin, Kraut Rks	lava	subaerial, edifice-building	200	<+200 (?)	125	0.46	±	0.04	D	W 1999
-76.0378	-135.959	Berlin, Kraut Rks	lava	subaerial, edifice-building	200	<+200 (?)	125	0.578	±	0.0089	D	W 1999
-75.3496	-110.71	Murphy, Sechrist Pk	hyalotuff	emergent, late-stage tuff cone/tuya	550	550	30	0.609	±	0.027	F	W&M (2002)), L (1994)
-76.8078	-117.699	Frakes, English Rk	scoriaceous tuff	subaerial, late-stage cone	250	<+250	275	0.858	±	0.066	F	W&M 2002
-76.0373	-135.126	Moulton, Gawne N	scoriaceous tuff	subaerial, late-stage cone	200	<+200	125	1.04	±	0.04	C	W (1997)
-76.9503	-116.811	Crary Mtns, Boyd R	scoriaceous tuff	subaerial, late-stage cone	200	<+200	275	1.272	±	0.027	C	W (1997)
-76.8078	-117.699	Frakes, English Rk	scoriaceous ruff	subaerial, late-stage cone	350	<+350	275	1.62	±	0.02	F	W&M 2002
-76.9503	-116.811	Boyd R, Runyon Rk	hyalotuff-hyaloclastite	subglacial-emergent, isolated monogenetic(?)	50	50	280	2.05	±	0.05	F	W&M 2002
-75.0461	-133.769	HCN, Coleman N	hyalotuff, lava	emergent-subaerial, interfluve	0	same?	75	2.6	±	0.01	G	W&M 2007
-75.9676	-136.054	Berlin Brandenberger B	hyalotuff, jointed lava	subglacial to emergent, exhumed tuya	300	<-50	125	2.77	±	0.06	D	W 1999
-75.7223	-129.059	Flint	scoriaceous tuff	subaerial, late stage cone	100	< +100	100	3.75	±	0.06	C	W (1997)
-76.0373	-135.126	Moulton, Edwards Sp.	lava	subaerial, edifice-building	100	<+100	125	4.03	±	0.14	C	W (1997)
-77.057	-126.135	Sidley	lava, tuff	subaerial, edifice-Building	0	same	300	4.64	±	0.04	B	P 1994
-75.3496	-110.71	Murphy, Turtle Pk	scoriaceous tuff/ pillow lava	subglacial to emergent, interfluve	200	same(?)	30	4.76	±	0.15	F	W&M 2002
-75.0461	-133.769	HCN, Cousins Rk.	hyalotuff, scoriaceous tuff	emergent-subaerial, interfluve	0	same(?)	70	5	±	0.07	G	W&M 2007
-75.0461	-133.769	HCN, Shibuya Pk	hyalotuff	emergent-subaerial, interfluve	0	same(?)	60	5	±	0.28	G	W&M 2007
-75.3496	-110.71	Murphy Turtle Pk.	scoriaceous tuff/ pillowlava	subglacial to emergent, interfluve	200	same(?)	30	5.723	±	0.23	F	W&M 2002
-75.3496	-110.71	Murphy, Turtle Pk .	scoriaceous tuff/ pillow lava	subglacial to emergent, interfluve	200	same(?)	30	6.027	±	0.6	F	W&M 2002
-75.3496	-110.71	Murphy, Hedin N.	scoriaceous tuff/ pillow lava	subglacial to emergent, interfluve	200	same(?)	30	6.28	±	0.24	F	W&M 2002
-75.0461	-133.769	HCN, Holmes Bl.	scoriaceous tuff	subaerial, interfluve	0	same(?)	40	6.36	±	0.07	G	W&M 2007
-76.8196	-126.026	Hartigan	lava	subaerial, edifice-building	100	<+100	200	6.4	±	0.8	A	L&T (1990)
-75.3496	-110.71	Murphy, Hedin N.	scoriaceous tuff/ pillow lava	subglacial to emergent, interfluve	200	same(?)	30	6.58	±	0.12	F	W&M 2002
-75.3496	-110.71	Murphy Icefall N.	scoriaceous tuff/ pillow lava	subglacial to emergent, interfluve	200	same(?)	30	6.61	±	0.13	F	W&M 2002
-75.3496	-110.71	Murphy Icefall N.	scoriaceous tuff/ I pillow lava	subglacial to emergent, interfluve	200	same(?)	30	6.888	±	0.2	F	W&M 2002
-75.6308	-132.377	Kauffman	lava	subaerial, edifice-building	400	<+400	90	7.1	±	1.5	A	L&T1990
-75.0461	-133.769	HCN, Kennel Pk	pillow/hyaloclastite/ tillite	subglacial-subaerial(?), interfluve	25	25	45	8.01	±	0.87	G	W&M 2007
-76.725	-117.781	Steere, Lie r.( oldest)	hyaloclastite- pillow/subaerial lava	subglacial/subaerial, slope-ice	0	same or lower	250	8.3	±	0.18	F	W&M 2002
-76.6744	-118.073	Rees, Tasch R. (youngest)	hyaloclastite- pillow/subaerial lava	subglacial/subaerial, slope-ice	0	same or lower	250	8.32	±	0.13	F	W&M 2002
-75.3496	-110.71	Murphy, main shield (top)	pillow/hyaloclastite, scoriaceous tuff	subglacial-subaerial, edifice-building, coastal	300	same?	30	8.327	±	0.04	F	W&M 2002
-76.8196	-126.026	Hartigan	lava	subaerial, edifice-building	250	<+250	200	8.36	±	0.82	A	L&T(l990)
-76.0078	-132.971	Bursey, Starbuck Cr.	scoriaceous tuff	subaerial, late- stage cone	50	<+50	140	8.56	±	0.06	C	W (1997)
-76.8196	-126.026	Hartigan	lava	subaerial, edifice-building	200	<+200	200	8.5	±	0.66	A	L&T 1990
-76.725	-117.781	Steere, Lie Cliff(oldest)	hyaloclastite- pillow/subaerial lava	subglacial/subaerial, slope-ice	0	same or lower	250	8.63	±	0.23	F	W&M 2002
-75.7223	-129.059	Flint	scoriaceous tuff	subaerial, late- stage cone	100	<+100	90	8.66	±	0.24	C	W (1997)
-75.7161	-132.2	Kosciusko	lava	subaerial, edifice-building	200	<+200	110	9.2	±	1.3	A	L&T(l990)
-75.3496	-110.71	Murphy, main shield (near top)	pillow hyaloclastite/ scoriaceous tuff	subglacial/subaerial, edifice-building, coastal	300	<+300	30	8.96	±	0.13	F	W&M (2002)
-76.6744	-118.073	Rees, Trabucco C. (youngest)	hyaloclastite- pillow/subaerial lava	subglacial/subaerial, thin slope-ice	0	same or lower	250	9.06	±	0.06	F	W&M (2002)
-76.6744	-118.073	Rees, Trabucco C. (oldest)	pillow hyaloclastite/subaerial lava	subglacial/subaerial, thin slope-ice	0	same or lower	250	9.25	±	0.53	F	W&M (2002)
-75.8083	-132.347	Andrus, Lind, near	scoriaceous tuff	subaerial, late- stage	250	<+250	110	9.28	±	0.06	C	W (1997)
-76.6744	-118.073	Rees, Tasch R (oldest)	hyaloclastite-pillow/subaerial lava	subglacial/subaerial, thin slope-ice	0	same or lower	250	9.46	±	0.24	F	W&M (2002)
-75.3496	-110.71	Murphy, main shield (base)	pillow hyaloclastite / scoriaceous tuff	subglacial/subaerial, edifice-building	300	<+300	30	9.46	±	0.2	F	W&M (2002)
-75.7223	-129.059	Flint	cinder cone	subaerial, late-stage flank	300	<+300	90	9.67	±	0.2	C	W (1997)
-75.0461	-133.769	HCN, Bowyer Bt.	lava, hyaloclastite	subglacial-subaerial(?), interfluve	200	<+200	25	9.82	±	1.8	A	L&T(l990)
-76.0078	-132.971	Bursey, Koerner	lava	subaerial, edifice-building	400	<+400	140	10.08	±	0.06	C	W (1997)
-76.6786	-125.806	Cumming	lava	subaerial, edifice-building	200	<+200	250	10	±	1	A	L&T(l990)
-75.7161	-132.2	Kosciusko	lava	subaerial, edifice-building	200	<+200	110	9.2	±	1.3	A	L&T(l990)
-76.4937	-125.785	Hampton	lava	subaerial, edifice-building	200	<+200	210	11.09	±	0.04	A	this study
-75.8083	-132.347	Andrus, Lind R.	clastogenic lava	subaerial, edifice-building	200	<+200	110	11.19	±	0.08	C	W (1997)
-75.0461	-133.769	HCN, Patton B	hyalotuff, lava	emergent-subaerial, interfluve	0	0	65	11.45	±	0.23	G	W&M 2007
-75.8083	-132.347	Andrus, Lind R.	clastogenic lava	subaerial, edifice-building	200	<+200	110	12.71	±	0.06	C	W (1997)
-76.4937	-125.785	Whitney	lava	subaerial, edifice-building	200	<+200	210	13.36	±	0.05	A	this study
-75.9376	-125.878	U.S.A.S., Aldaz	scoriaceous tuff	subaerial, isolated monogenetic/glacial u.c.	0	same or lower	175	19.68	±	0.31	C	W (1997)
-75.7223	-129.059	Flint, Reynolds R.	lava	subaerial, edifice-building	0	same or lower	90	20.46	±	0.08	C	W (1997)
-75.9376	-125.878	U.S.A.S.-- Galla	hyalotuff	emergent, slope ice (?)	0	same(?)	175	26.4	±	0.21	C	W (1997)
-75.8624	-128.649	Petras	hyalotuff	emergent, slope ice	325	n.d.	170	27.53	±	0.23	E	W&M 2000
-75.8624	-128.649	Petras	hyalotuff	emergent, slope ice	750	n.d.	170	27.26	±	0.52	E	W&M 2000
-75.8624	-128.649	Petras	hyalotuff	emergent, slope ice	580	n.d.	170	28.26	±	0.38	E	W&M 2000
-75.8624	-128.649	Petras	hyalotuff	emergent, slope ice	430	n.d.	170	28.96	±	0.22	E	W&M 2000
-75.8624	-128.649	Petras	lava	subaerial, isolated monogenetic	740	n.d.	170	36.58	±	0.22	E	W&M 2000

## Sheet: Notes on Table 4
Volcano/ Locality: Outcrop localities are shown on maps of specific volcanoes in the manuscript.
Diagnostic Facies for distingushing ice contact from subaerial eruptive paleoenvironments.
Paleoenvironment relates the conceptual models shown in Figure 38. Subglacial to subaerial refers to a passage zone.
Rel to local ice (m) lists the elevation (in m) relative to the local elevation of the WAIS.
Rel. to regional Paleo-ice lists approximate elevation (m) constraints on ice-levels of regional ice sheet. Subaerial outcrops provide maximum heights of paleo-ice at the times of eruptions, although ice could also have been much lower or absent.

## Sheet: Ref code
Reference Key
L&T (1990)	A
Panter 1994	B
Wilch 1997	C
Wilch et al. 1999	D
Wilch & McIntosh 2000	E
Wilch & McIntosh 2002	F
Wilch a & McIntosh 2007	G
this study	H
